# Supplementary material
Source: Research Square preprint supplement (doi:10.21203/rs.3.rs-9920193/v1)
Supplement: Supplementary file 1 [file 2953a50bd952730ba0d8a21b.xlsx]

## Sheet: Sheet1
Identity	Respondent Name/No.	Age	Gender	Degree	Dress 1 [This is a typical design.]	Dress 1 [This is a novel design. ]	Dress 1 [This design is pleasing to see.]	Dress 2 [This is a typical design.]	Dress 2 [This is a novel design. ]	Dress 2 [This design is pleasing to see.]	Dress 3 [This is a typical design.]	Dress 3 [This is a novel design. ]	Dress 3 [This design is pleasing to see.]	Dress 4 [This is a typical design.]	Dress 4 [This is a novel design. ]	Dress 4 [This design is pleasing to see.]	Dress 5 [This is a typical design.]	Dress 5 [This is a novel design. ]	Dress 5 [This design is pleasing to see.]	Dress 6 [This is a typical design.]	Dress 6 [This is a novel design. ]	Dress 6 [This design is pleasing to see.]	Dress 7 [This is a typical design.]	Dress 7 [This is a novel design. ]	Dress 7 [This design is pleasing to see.]	Dress 8 [This is a typical design.]	Dress 8 [This is a novel design. ]	Dress 8 [This design is pleasing to see.]	Dress 9 [This is a typical design.]	Dress 9 [This is a novel design. ]	Dress 9 [This design is pleasing to see.]	Dress 10 [This is a typical design.]	Dress 10 [This is a novel design. ]	Dress 10 [This design is pleasing to see.]
1	1	2	2	1	7	2	4	7	1	4	6	2	5	2	7	7	6	3	7	2	6	7	1	7	5	1	7	7	2	7	4	1	7	7
1	2	2	2	1	6	4	5	7	4	6	6	6	6	6	5	6	6	4	5	6	4	6	4	4	3	2	6	7	3	7	5	2	6	5
1	3	3	2	1	7	2	7	7	2	7	7	3	6	6	6	7	6	3	5	5	7	6	2	7	4	2	7	5	1	7	5	2	7	4
1	4	2	2	1	7	1	2	7	1	2	4	5	3	6	5	3	7	2	5	7	2	5	2	5	1	1	5	6	1	6	4	1	7	5
1	5	2	2	1	7	1	3	6	2	1	4	4	7	3	6	3	7	3	4	5	3	7	1	7	5	2	5	5	1	7	5	1	6	6
1	6	2	2	1	7	1	4	6	2	6	3	5	5	3	5	6	5	3	6	2	5	6	1	7	3	2	6	7	1	7	6	1	7	7
1	7	2	2	1	7	1	6	7	2	6	5	3	1	6	2	1	7	1	3	7	2	7	1	7	1	1	7	4	1	7	3	1	7	5
1	8	2	2	1	7	1	5	7	1	4	5	2	4	1	7	6	5	3	5	7	1	7	1	7	1	1	7	7	1	7	4	1	7	5
1	9	2	2	1	4	1	1	5	1	1	6	1	1	5	1	4	7	2	2	6	3	4	3	5	1	3	5	4	3	5	5	3	6	4
1	10	2	2	1	4	2	3	5	3	4	5	3	2	4	5	5	5	4	5	4	5	5	4	5	2	2	6	2	4	6	3	3	6	3
1	11	2	2	1	7	4	4	7	1	2	7	3	2	6	4	2	4	4	3	6	6	6	3	7	1	2	6	7	3	6	7	3	7	5
1	12	3	2	1	6	4	6	7	4	6	5	6	6	5	6	7	7	6	7	6	6	6	5	7	5	3	6	6	5	7	5	3	7	5
1	13	2	2	1	6	4	6	6	3	4	3	4	3	4	6	4	5	5	5	4	6	5	3	6	3	3	6	6	4	6	5	3	7	5
1	14	2	2	1	6	2	2	6	2	2	6	2	2	3	6	2	5	3	3	4	6	6	4	4	2	3	5	5	3	6	6	2	6	6
1	15	2	2	1	5	4	4	5	3	4	5	3	3	5	4	5	5	4	6	4	5	5	4	5	3	3	5	5	4	6	5	4	6	5
1	16	2	2	1	5	2	5	6	3	4	6	6	6	6	6	6	6	5	6	6	5	6	5	6	2	3	6	5	3	7	6	6	5	6
1	17	2	2	1	5	1	2	5	2	2	5	4	3	5	3	5	5	5	5	4	5	4	3	5	5	3	5	5	3	7	1	3	7	4
1	18	2	2	1	5	1	2	7	2	5	5	3	1	7	5	6	7	5	7	6	6	6	1	5	2	2	7	4	1	7	6	1	7	5
1	19	2	2	1	7	3	6	6	2	5	4	5	5	6	4	7	6	5	7	5	4	7	4	4	6	2	5	4	4	5	5	2	7	7
1	20	2	2	1	6	3	6	7	3	6	5	6	7	4	5	7	7	6	7	6	7	7	6	6	6	4	7	7	3	7	4	5	6	7
1	21	2	2	1	6	2	4	4	2	2	4	4	2	4	5	5	5	5	7	5	5	6	5	5	4	3	6	5	5	6	4	4	6	4
1	22	2	2	1	4	3	5	4	3	6	5	7	4	6	7	6	6	6	6	7	7	7	6	6	4	6	7	6	6	6	7	6	6	6
1	23	2	2	1	3	1	2	3	1	2	6	1	3	5	4	3	2	3	4	4	2	6	5	5	4	3	5	4	7	7	5	6	5	4
1	24	3	2	1	6	3	4	7	4	6	5	6	5	5	5	5	4	5	4	3	6	5	3	6	4	3	6	4	2	7	5	1	6	6
1	25	2	2	1	3	2	5	1	1	2	2	2	1	6	5	6	7	7	7	6	6	7	6	4	2	4	5	6	3	7	6	6	5	7
1	26	4	2	1	7	4	4	4	4	5	3	4	3	3	5	4	4	6	6	4	7	6	4	6	5	3	6	6	3	7	2	3	7	6
1	27	3	2	1	7	5	5	4	4	4	5	5	4	4	5	6	4	4	5	5	4	4	4	5	4	3	4	4	6	6	5	5	5	4
1	28	3	2	1	7	3	5	7	5	7	6	7	5	6	7	5	7	5	4	7	5	1	5	6	3	6	7	7	5	7	7	4	7	1
1	29	3	2	1	7	3	5	7	1	4	7	4	4	7	4	5	7	5	5	7	6	6	4	5	3	7	5	7	2	6	3	2	7	1
1	30	2	2	1	3	3	4	3	4	3	2	3	4	5	5	6	5	5	6	5	5	5	5	5	2	4	5	4	5	5	3	5	5	2
1	31	2	2	1	5	2	5	7	1	2	1	6	5	3	5	5	3	3	6	3	5	4	2	7	2	3	5	3	4	3	3	2	5	5
1	32	3	2	1	7	3	4	6	1	1	5	4	2	6	7	7	4	7	7	3	7	7	1	7	2	5	7	7	2	7	7	2	7	7
1	33	3	2	2	5	4	5	4	4	4	4	4	4	5	6	6	4	5	6	6	5	6	1	4	1	4	4	3	4	4	3	2	6	6
1	34	3	2	2	6	5	6	7	5	7	5	7	6	5	7	6	7	7	7	7	6	7	5	7	5	7	6	7	5	7	5	7	7	7
1	35	4	2	1	7	2	7	3	4	5	5	5	4	7	7	7	7	6	2	7	7	6	7	6	1	2	7	7	2	7	6	2	7	4
1	36	2	2	1	6	2	5	6	2	4	3	5	5	2	5	5	6	2	6	6	4	2	3	6	1	2	6	4	2	7	7	2	6	7
1	37	3	2	1	3	4	5	5	4	5	7	7	7	6	6	7	7	6	6	5	5	6	5	3	3	5	7	7	5	7	7	3	7	7
1	38	3	2	1	6	5	5	5	4	5	6	7	6	4	5	4	6	5	6	3	4	4	5	6	6	6	7	7	5	5	5	6	6	5
1	39	2	2	1	5	3	3	3	3	7	4	4	3	5	5	5	5	5	6	6	6	6	5	5	2	6	6	6	5	3	3	6	6	2
1	40	2	2	1	4	2	5	6	5	6	4	5	7	5	5	6	7	5	7	6	7	7	4	7	6	4	7	7	2	6	6	1	7	7
1	41	2	2	1	5	2	6	4	4	6	7	4	6	7	5	7	6	7	7	6	7	7	3	7	5	4	7	7	3	7	6	4	7	5
1	42	2	2	1	7	2	6	7	2	3	3	6	3	5	3	6	4	7	7	2	6	6	1	7	2	1	6	6	1	7	7	1	7	7
1	43	3	2	1	6	2	4	6	2	4	5	4	5	3	5	6	5	3	5	3	6	6	4	5	4	3	6	6	2	7	7	1	7	5
1	44	3	2	2	7	3	3	6	4	6	6	4	2	4	2	6	3	5	6	5	5	7	3	5	5	3	6	7	3	6	4	3	7	6
1	45	2	2	1	6	2	5	1	1	7	1	1	3	7	7	7	7	7	7	7	7	7	7	7	4	7	7	7	7	7	7	7	7	7
1	46	3	2	1	7	2	6	7	1	3	6	2	3	2	6	7	6	2	6	4	3	5	1	7	1	1	7	6	1	7	7	2	6	6
1	47	3	2	1	5	3	7	3	2	3	4	4	5	5	3	6	5	4	6	6	4	6	5	5	1	5	6	5	5	6	3	5	5	4
1	48	3	2	1	7	2	3	3	2	3	2	3	4	3	6	7	4	6	7	5	6	7	6	5	5	3	6	7	3	6	6	2	7	7
1	49	2	2	1	4	3	4	4	3	3	3	4	3	4	5	5	4	5	5	5	6	6	3	5	3	4	5	5	4	5	5	4	5	5
1	50	2	2	1	6	3	6	5	3	3	6	6	4	4	6	7	4	5	6	3	4	6	4	5	5	3	5	5	5	7	6	3	5	5
1	51	2	1	1	6	2	5	6	4	5	7	4	5	3	6	5	4	6	6	3	6	6	3	7	5	3	6	6	3	7	5	2	7	3
1	52	3	1	2	6	1	6	5	2	5	3	5	6	3	6	7	6	3	6	5	3	5	3	6	2	2	6	5	1	7	2	2	7	3
1	53	2	1	1	7	2	5	5	5	6	4	5	6	6	5	7	7	5	6	7	5	7	7	7	2	6	6	6	2	5	3	5	5	2
1	54	2	1	2	6	6	6	6	6	5	2	2	2	1	5	2	7	6	6	6	5	2	2	1	3	6	6	6	2	3	4	5	6	6
1	55	2	1	1	6	5	5	6	3	6	3	3	3	4	2	2	7	4	4	5	3	4	3	6	6	5	6	6	2	6	6	2	6	6
1	56	2	1	1	3	3	3	6	3	4	5	3	4	4	5	3	5	3	4	4	4	4	3	5	4	2	6	4	2	5	4	3	5	5
1	57	2	1	1	5	2	7	4	4	3	2	3	4	3	4	3	5	3	2	4	4	3	2	3	3	4	4	3	4	6	4	3	5	6
1	58	3	1	1	7	3	3	6	2	3	4	6	5	5	4	5	7	3	6	7	3	7	3	3	4	6	4	7	3	6	7	4	6	7
1	59	2	1	1	7	3	2	5	2	2	7	2	2	6	4	6	3	5	4	6	5	3	1	3	1	3	6	7	1	7	7	2	5	4
1	60	2	1	1	3	2	6	5	2	6	4	5	4	4	5	6	5	3	6	4	4	4	2	5	2	4	6	6	3	3	4	3	6	3
1	61	2	1	1	7	2	6	6	3	6	7	2	3	2	6	6	6	3	6	6	3	6	5	3	5	2	6	6	2	7	7	1	7	3
1	62	2	1	1	7	1	3	7	1	1	7	1	3	5	4	7	2	4	7	2	6	6	1	7	2	1	7	5	2	7	7	2	7	7
1	63	2	1	1	7	3	3	6	3	2	6	3	5	1	6	5	2	6	1	3	6	6	4	6	4	2	7	6	2	7	6	1	7	7
1	64	2	1	1	7	1	7	7	2	5	6	4	6	4	4	6	7	4	6	4	4	5	4	6	4	3	7	7	2	6	7	1	7	7
1	65	2	1	1	6	3	2	6	3	5	4	4	5	6	6	5	3	6	4	6	6	3	3	6	2	3	6	2	1	7	5	1	6	6
1	66	2	1	1	7	3	2	7	2	3	3	3	3	5	3	6	6	3	3	3	6	6	3	5	3	4	7	4	4	6	3	4	6	6
1	67	2	1	1	3	3	4	3	3	3	3	3	4	4	3	4	4	3	4	5	3	5	5	3	5	5	5	5	3	3	4	5	6	5
1	68	2	1	1	7	4	5	6	4	6	4	5	4	4	5	6	6	4	7	4	5	3	4	6	3	4	6	5	3	6	5	4	6	5
1	69	2	1	1	4	2	4	6	2	4	4	4	5	5	5	6	6	4	6	6	4	6	1	7	5	6	7	6	3	7	7	4	5	5
1	70	2	1	1	6	3	4	7	1	2	4	4	3	4	6	4	6	1	6	5	2	4	6	6	6	5	4	2	5	6	2	3	6	6
1	71	2	1	1	5	3	3	5	3	5	5	3	6	3	6	7	3	5	7	2	6	6	2	6	3	4	6	4	3	7	4	3	7	6
1	72	3	1	1	6	1	1	6	1	4	3	1	1	3	4	4	5	6	5	2	6	7	3	5	2	1	6	7	1	7	7	1	7	6
1	73	2	1	1	4	2	2	3	2	2	3	2	1	2	3	2	3	3	2	4	6	5	4	3	2	4	6	5	2	3	3	3	3	2
1	74	3	1	2	6	3	5	7	4	4	7	6	3	3	7	7	7	5	7	3	7	6	6	5	4	3	6	7	7	6	7	6	5	7
1	75	3	1	2	6	4	6	6	3	5	3	3	5	6	7	7	7	5	6	6	7	7	3	5	6	2	7	7	1	7	1	2	7	7
1	76	2	1	1	5	3	3	6	3	4	5	3	4	4	6	6	5	3	5	2	5	5	5	5	4	5	4	5	3	6	7	2	7	6
1	77	2	1	1	7	2	4	7	1	2	4	1	2	5	4	4	7	3	5	7	2	5	4	5	5	3	7	5	2	6	6	2	7	4
1	78	2	1	1	6	3	4	4	1	4	4	4	5	4	3	2	4	4	5	6	6	6	4	7	5	4	6	5	3	7	7	3	7	6
1	79	3	1	1	7	4	6	7	4	5	5	6	4	6	6	6	7	5	6	5	6	6	2	7	4	2	7	7	3	7	7	1	7	7
1	80	4	1	2	6	1	7	6	4	7	7	5	4	6	7	7	6	5	7	7	6	7	3	6	5	2	6	7	2	6	5	3	7	4
1	81	2	1	1	6	4	4	6	4	6	4	4	5	4	4	4	4	4	3	4	4	3	4	5	4	2	5	3	3	7	4	2	7	2
1	82	2	1	2	7	1	7	7	1	3	5	6	3	6	5	4	6	6	7	4	4	7	4	6	6	2	6	5	4	7	6	1	6	7
1	83	2	1	1	6	4	3	6	4	4	5	4	3	5	6	5	6	6	6	5	6	5	5	5	4	4	5	4	3	5	3	4	6	3
1	84	2	1	1	5	4	5	6	3	3	6	3	3	5	4	5	6	3	4	5	4	3	2	5	2	4	5	7	4	7	7	4	7	7
1	85	2	1	1	7	2	1	7	1	4	4	1	3	6	7	4	5	6	7	7	6	6	2	5	5	3	7	6	2	7	7	1	7	7
1	86	2	1	1	7	2	1	7	1	4	4	1	3	6	7	4	5	6	7	7	6	6	2	5	5	3	7	6	2	7	7	1	7	7
1	87	2	1	1	7	4	7	4	4	5	4	5	2	2	4	2	3	6	6	3	7	6	1	7	1	2	5	3	1	5	7	4	7	7
1	88	2	1	1	7	4	7	5	6	7	6	5	6	4	7	7	6	3	7	5	3	6	4	6	5	2	6	7	2	6	5	2	6	5
1	89	2	1	1	4	4	4	6	3	4	6	4	4	5	4	4	7	4	5	5	4	6	3	7	4	3	6	5	3	6	5	3	6	4
1	90	2	1	1	6	3	5	5	6	4	5	5	5	3	7	5	6	5	6	5	6	7	6	7	5	4	6	7	2	7	7	4	7	7
1	91	3	1	1	7	1	2	7	1	2	7	1	2	3	3	3	3	3	3	3	3	3	6	2	1	4	5	6	2	6	5	2	5	6
1	92	4	1	2	4	3	6	6	4	5	4	6	5	4	7	6	6	5	7	5	4	5	2	7	4	3	6	6	3	7	6	3	7	6
1	93	2	1	1	6	2	5	6	2	5	6	6	2	3	6	6	6	5	6	6	5	6	6	4	4	2	6	5	1	7	2	4	7	5
1	94	2	1	1	6	4	6	6	4	4	6	4	4	5	5	5	4	5	4	4	4	4	4	5	4	4	5	3	1	5	1	3	5	4
1	95	3	1	1	6	4	6	5	4	6	4	4	3	5	6	5	5	5	6	5	5	4	3	5	3	4	7	3	2	7	4	3	7	3
1	96	2	1	1	4	3	6	6	2	2	3	3	1	5	6	5	4	2	6	4	5	5	3	5	2	4	5	6	2	6	6	1	6	2
1	97	2	1	1	7	1	4	7	1	6	4	3	1	6	6	3	4	6	1	4	5	7	3	5	3	4	7	5	2	7	4	2	7	7
1	98	2	1	1	5	3	3	6	2	3	3	6	3	4	6	6	4	3	6	2	6	7	3	6	5	3	6	4	2	6	4	3	6	5
1	99	2	1	1	6	3	3	4	5	3	5	3	2	5	7	6	5	6	6	3	7	5	3	7	4	4	6	6	2	6	2	4	7	5
1	100	2	1	1	7	3	5	6	2	5	7	1	3	3	5	5	6	2	7	2	6	3	1	1	2	1	6	5	2	5	6	1	4	3
2	101	4	2	3	5	3	6	3	4	6	6	4	2	6	6	3	7	7	7	6	7	7	5	5	2	4	6	6	5	6	2	6	7	3
2	102	2	2	2	5	2	2	6	2	2	5	2	3	2	5	3	5	2	6	3	5	4	1	6	1	2	6	4	2	6	1	2	5	2
2	103	2	2	1	7	3	6	5	2	5	4	4	3	6	3	6	6	2	6	5	2	3	3	5	2	2	6	4	2	6	6	2	7	4
2	104	2	2	1	6	3	4	6	4	3	6	3	6	5	7	7	5	7	7	6	7	7	3	7	4	4	7	5	3	7	7	3	7	5
2	105	2	2	1	6	2	2	5	2	7	5	3	2	4	5	7	6	3	5	5	3	4	3	6	1	2	5	2	2	7	6	2	7	7
2	106	2	2	1	6	2	6	7	1	2	2	6	2	2	7	7	4	5	7	3	6	5	1	7	1	3	7	2	2	5	2	4	7	1
2	107	2	2	1	7	3	5	5	2	4	7	7	7	6	6	2	7	7	4	7	7	7	4	5	1	3	5	1	1	6	1	1	7	1
2	108	2	2	1	6	3	3	6	2	3	6	2	3	3	5	5	3	4	5	2	5	6	1	4	2	1	7	7	1	5	6	1	7	5
2	109	2	2	1	6	2	3	5	2	3	3	3	3	5	5	5	3	5	5	2	5	5	2	6	2	3	6	5	1	6	4	2	5	3
2	110	2	2	1	7	2	4	5	2	2	3	5	4	3	6	5	3	4	4	4	4	5	2	5	2	2	6	6	2	6	2	2	6	6
2	111	2	2	1	5	3	5	7	4	5	6	5	4	5	6	6	6	7	7	7	7	7	3	7	5	4	6	5	1	7	5	1	7	7
2	112	2	2	1	7	4	5	2	3	3	5	6	3	7	3	7	6	3	5	5	4	2	5	7	5	5	5	7	5	7	5	3	7	3
2	113	2	2	1	7	5	7	7	5	7	7	6	7	7	6	6	4	6	7	7	6	7	7	7	7	5	7	6	1	7	7	6	7	7
2	114	2	2	1	7	2	3	7	2	4	6	2	3	4	6	2	6	2	5	6	6	7	5	1	1	1	6	5	2	5	4	2	7	7
2	115	2	2	1	7	1	3	7	1	3	5	2	4	5	4	4	5	2	5	4	4	4	1	7	3	1	7	2	1	7	1	1	7	7
2	116	3	2	2	2	5	2	6	4	5	7	7	5	6	6	7	6	6	6	7	7	7	6	7	5	1	7	6	3	6	7	3	6	7
2	117	2	2	1	7	4	6	6	4	6	6	5	6	7	5	6	6	5	5	7	6	7	4	5	5	2	7	7	3	7	7	3	6	7
2	118	2	2	1	5	4	5	7	2	2	4	4	5	4	5	5	4	4	4	4	5	5	4	5	5	2	5	4	3	5	5	2	6	4
2	119	4	2	2	7	3	4	6	1	2	4	4	4	6	3	3	3	4	4	1	7	4	3	5	4	2	7	7	1	7	6	1	7	7
2	120	2	2	1	7	3	4	7	2	3	4	4	3	4	4	6	7	4	5	4	5	6	2	6	2	2	7	5	2	7	4	2	7	7
2	121	4	2	2	6	2	2	4	4	3	4	5	4	3	5	3	6	4	5	5	5	6	3	6	2	2	6	5	4	7	7	2	6	7
2	122	2	2	1	5	1	2	7	2	5	5	3	1	7	5	6	7	7	7	6	6	6	1	5	2	2	7	4	1	7	6	1	7	5
2	123	2	2	1	6	3	6	7	3	6	5	6	7	4	5	7	6	6	7	6	7	7	3	6	6	4	7	7	3	7	4	2	6	7
2	124	2	2	1	7	3	6	4	2	5	6	6	6	6	5	7	6	5	7	5	5	7	6	5	6	1	4	4	4	5	5	1	7	7
2	125	2	2	1	6	4	6	6	3	4	5	4	3	4	6	4	5	5	5	4	6	5	3	6	3	3	6	6	4	6	5	3	7	5
2	126	2	2	1	7	2	6	6	4	6	6	4	4	4	5	6	6	5	5	4	4	7	4	5	4	3	7	7	2	7	7	1	6	7
2	127	4	1	2	7	3	7	3	7	6	4	7	7	6	7	7	5	7	7	6	7	7	5	7	7	6	7	7	3	7	7	5	7	7
2	128	2	1	2	6	2	5	6	4	4	4	5	4	4	6	5	5	4	5	3	6	4	3	5	4	2	5	4	4	6	4	1	6	2
2	129	2	1	2	5	2	6	5	1	2	4	6	4	3	7	7	5	6	7	4	3	4	4	5	2	4	5	4	1	7	7	1	6	3
2	130	2	1	1	6	2	5	6	2	5	6	6	2	3	6	6	6	5	6	6	5	6	6	4	4	1	6	5	1	7	2	4	7	5
2	131	2	1	1	5	4	4	5	3	4	3	3	4	5	4	5	5	3	4	5	6	5	4	3	4	3	5	7	4	6	4	4	6	6
2	132	2	1	1	6	4	6	6	4	4	4	5	4	5	6	5	4	4	4	4	5	4	4	5	4	4	5	3	1	5	1	1	5	4
2	133	3	1	1	6	4	6	5	4	6	4	5	3	6	5	5	4	4	6	5	5	4	3	4	3	3	7	3	3	7	4	3	7	3
2	134	3	1	1	6	3	6	6	2	2	3	3	1	5	5	5	4	2	6	5	5	5	4	5	2	4	5	6	2	6	6	2	6	2
2	135	3	1	1	6	4	4	5	3	7	4	4	6	5	6	6	5	5	6	5	5	6	4	5	7	1	7	7	1	7	7	1	7	4
2	136	2	1	1	7	1	4	7	1	1	4	3	1	6	6	3	5	6	4	4	4	7	3	3	3	4	7	5	4	7	4	4	7	7
2	137	3	1	2	6	2	6	5	3	5	5	5	5	6	6	6	6	6	6	6	6	6	3	5	5	3	5	5	3	5	3	3	5	5
2	138	2	1	1	6	3	3	5	2	3	3	6	3	4	6	6	4	5	6	2	6	7	3	6	5	3	6	4	2	6	4	3	6	5
2	139	2	1	1	6	4	7	7	1	1	4	4	7	7	6	7	7	7	7	7	7	7	4	5	7	3	7	4	1	7	7	1	6	7
2	140	2	1	1	5	1	1	4	1	6	3	4	1	7	7	7	7	6	7	4	5	3	1	4	1	1	6	7	3	6	2	3	6	3
2	141	2	1	1	6	2	2	6	2	2	4	2	2	4	5	5	4	5	2	5	5	5	4	5	5	1	5	5	1	5	5	2	5	5
2	142	2	1	1	7	1	6	6	4	7	4	5	7	7	7	7	7	7	7	7	7	7	2	7	5	1	5	7	2	7	7	1	6	7
2	143	2	1	1	7	1	1	6	2	2	4	2	2	4	5	5	2	5	1	5	6	5	2	5	2	3	5	3	1	7	1	1	7	1
2	144	2	1	1	7	3	7	6	3	4	6	4	5	5	6	7	5	5	6	7	7	7	4	5	5	2	7	7	2	7	4	1	7	7
2	145	2	1	1	6	3	5	6	4	4	4	5	3	4	5	5	6	5	6	6	6	6	5	4	4	2	6	6	4	7	5	3	5	6
2	146	2	1	1	7	4	7	4	4	4	1	1	1	1	7	5	6	4	6	1	7	7	1	4	1	1	7	4	1	7	1	1	7	1
2	147	2	1	1	6	3	4	5	3	2	4	3	4	5	4	5	5	4	5	5	4	5	4	4	4	4	5	4	3	6	3	3	5	2
2	148	2	1	1	7	2	2	7	2	4	6	2	4	6	6	6	7	4	6	6	2	4	3	5	2	3	6	5	3	7	5	2	6	6
2	149	2	1	1	6	3	5	6	2	2	5	2	5	4	6	6	3	5	7	6	2	6	2	4	4	3	6	5	2	6	5	2	7	5
2	150	2	1	1	6	3	5	6	3	3	6	5	4	6	6	4	6	6	6	6	6	4	4	5	4	3	6	4	3	6	6	4	6	6
2	151	2	1	1	7	1	4	7	1	4	1	7	4	4	3	7	4	5	7	1	7	7	1	7	3	1	7	4	1	7	4	1	7	7
2	152	2	1	1	5	4	5	5	2	3	3	2	3	4	6	6	6	6	7	5	5	6	2	5	3	4	6	6	2	5	2	1	6	2
3	153	1	2	2	6	1	1	6	1	4	7	2	4	3	3	5	7	1	5	2	5	6	1	6	5	2	7	6	1	5	6	1	7	6
3	154	1	2	2	6	2	2	4	3	1	2	5	1	2	6	4	5	4	5	3	5	4	2	5	1	2	6	6	2	5	3	1	7	7
3	155	1	2	2	7	1	2	7	1	1	4	4	1	5	4	6	5	5	7	4	4	7	4	5	6	5	3	4	4	7	3	3	5	7
3	156	1	2	2	7	2	4	7	1	7	5	4	7	3	6	7	7	4	7	2	7	7	2	6	3	1	7	4	2	7	6	1	7	4
3	157	1	2	2	6	4	3	5	2	4	2	5	5	2	4	3	5	3	6	2	4	4	3	5	3	3	7	6	1	6	4	1	6	3
3	158	1	2	2	6	2	4	5	3	5	2	5	5	2	5	6	5	6	7	4	5	7	3	5	4	1	6	5	3	6	6	1	7	6
3	159	1	2	2	6	3	5	4	3	5	4	6	5	4	6	6	6	3	4	6	5	5	3	6	4	4	7	7	3	6	6	4	5	5
3	160	1	2	2	5	3	4	4	3	5	3	5	7	2	7	7	3	6	7	4	7	7	3	6	6	2	7	7	2	7	7	2	7	7
3	161	1	2	2	7	1	5	7	1	4	5	5	4	6	4	4	6	5	4	5	5	6	4	5	4	4	5	7	1	7	7	1	7	7
3	162	1	2	2	7	3	7	7	4	7	6	4	6	4	5	6	6	6	7	4	4	6	3	6	7	2	6	7	2	6	7	2	6	7
3	163	1	2	2	2	1	4	7	3	6	5	4	6	4	7	7	5	4	7	7	6	5	7	6	1	5	5	7	4	6	7	1	7	1
3	164	1	2	2	4	5	7	7	1	4	7	2	7	7	7	6	6	2	7	7	7	4	7	1	7	2	6	7	1	7	6	1	7	7
3	165	1	2	2	4	6	3	2	3	4	4	2	3	2	4	4	3	2	4	4	2	3	3	2	3	5	2	3	2	3	5	4	2	5
3	166	1	2	2	4	6	5	5	6	7	6	4	4	4	6	3	5	6	4	3	5	6	3	5	7	4	5	5	5	4	6	5	6	3
3	167	1	2	2	7	2	2	6	3	4	6	2	3	5	4	4	2	6	6	2	6	6	2	6	4	3	6	5	1	7	5	1	7	4
3	168	1	2	2	6	3	1	7	6	1	2	7	4	4	2	7	5	3	2	5	2	7	3	6	3	7	1	2	6	4	6	4	1	7
3	169	1	2	2	5	4	1	5	4	1	5	1	4	6	5	2	3	4	2	5	4	1	1	2	1	1	2	1	3	4	1	4	4	7
3	170	1	2	2	3	1	2	3	4	3	7	5	4	2	6	5	4	3	5	6	3	4	2	5	2	6	7	7	2	6	4	7	6	4
3	171	1	2	2	6	2	4	4	1	4	4	5	6	4	3	7	4	3	7	6	4	7	3	5	6	2	5	4	2	5	4	3	7	3
3	172	1	2	2	7	3	4	4	3	3	5	3	3	5	6	6	5	6	7	5	6	7	3	5	2	5	6	4	5	6	4	3	7	5
3	173	1	2	2	6	2	3	6	2	3	5	3	4	3	6	5	3	5	5	3	5	4	1	7	1	2	6	4	2	6	5	1	7	6
3	174	1	2	2	4	4	7	5	3	5	5	3	4	4	5	7	6	5	7	4	5	7	4	5	5	4	5	7	3	5	7	5	7	7
3	175	1	2	2	6	1	1	6	2	2	7	6	2	5	2	3	3	3	3	4	3	4	1	4	1	2	5	1	1	6	1	2	4	1
3	176	1	2	2	6	1	4	6	1	3	6	2	2	4	5	6	6	3	6	6	3	6	1	7	1	4	3	6	1	7	4	1	6	6
3	177	1	2	2	7	1	6	7	3	6	5	3	5	3	5	7	4	3	6	2	6	7	1	7	1	2	5	7	1	7	5	1	7	4
3	178	1	2	2	7	3	7	4	3	4	3	2	2	7	6	7	7	5	7	7	6	7	4	5	3	7	5	5	6	6	4	4	2	2
3	179	1	2	2	7	4	7	7	1	7	7	1	7	1	7	7	1	7	7	1	7	7	1	7	7	1	7	7	1	7	7	1	7	7
3	180	1	2	2	4	4	6	4	3	4	5	4	5	5	7	6	4	7	7	7	6	7	1	2	4	4	4	7	2	2	2	3	1	3
3	181	1	2	2	6	4	4	6	3	5	5	4	5	3	5	5	2	7	5	3	6	7	1	7	7	2	5	7	2	7	6	1	7	6
3	182	1	2	2	4	4	5	5	4	4	5	7	5	6	6	7	6	6	7	6	7	7	5	7	5	6	7	7	4	7	7	5	7	7
3	183	1	2	2	7	3	3	6	3	6	5	5	4	2	7	5	6	6	7	7	5	6	1	7	3	4	7	6	5	7	4	3	7	5
3	184	1	2	2	5	4	5	6	3	5	4	4	5	5	5	6	5	4	6	6	6	7	4	6	6	4	7	7	2	7	7	2	7	6
3	185	1	2	2	7	1	4	6	3	2	4	4	2	4	4	4	7	3	7	5	4	5	1	7	2	3	7	3	4	7	4	3	7	7
3	186	1	2	2	5	5	6	3	3	4	4	5	5	4	5	6	5	6	6	7	6	7	6	3	5	5	5	5	4	6	7	5	7	6
3	187	1	2	2	7	1	4	7	1	4	4	1	3	3	3	5	2	5	5	2	5	7	1	6	4	1	7	7	1	7	7	1	7	4
3	188	1	2	2	7	1	5	7	2	2	6	6	1	1	7	7	7	5	7	7	7	7	2	6	2	2	7	7	1	7	5	2	7	5
3	189	1	2	2	5	2	2	6	1	1	5	6	4	5	5	5	6	2	1	4	5	6	4	6	5	4	6	5	4	7	7	4	7	6
3	190	1	2	2	7	1	2	7	1	4	6	7	3	7	7	7	6	3	7	5	6	7	2	6	1	4	7	7	2	7	1	1	7	1
3	191	1	2	2	5	3	5	6	3	4	4	4	4	6	6	7	5	6	7	6	7	7	3	5	4	5	5	5	5	7	6	3	5	4
3	192	1	2	2	6	4	3	6	3	4	3	5	2	3	5	5	2	4	6	5	6	7	2	6	5	4	7	7	2	6	6	3	5	6
3	193	1	2	2	7	2	3	3	1	2	6	4	4	4	5	6	4	6	6	4	6	7	4	6	4	4	6	6	1	7	6	3	7	7
3	194	1	2	2	5	4	5	5	4	5	4	3	3	4	6	7	6	5	7	4	6	6	4	5	4	4	5	5	5	6	5	4	7	6
3	195	1	2	2	7	7	1	1	1	1	1	7	4	1	7	6	7	7	7	1	7	1	1	7	1	1	7	7	1	7	1	1	7	7
3	196	1	2	2	6	2	2	6	1	4	2	7	6	6	2	3	3	5	4	5	5	7	2	6	4	2	7	6	2	7	7	2	7	7
3	197	1	2	2	7	1	4	4	1	4	5	1	2	1	4	3	4	1	4	1	3	3	2	4	4	1	3	5	1	1	4	5	4	5
3	198	1	2	2	7	4	4	6	2	5	3	3	3	6	6	4	4	3	6	4	6	6	2	6	4	3	7	7	2	7	5	7	7	4
3	199	1	2	2	7	4	6	5	6	6	5	6	5	6	5	6	7	5	6	6	6	7	5	6	4	5	7	5	5	7	4	5	6	5
3	200	1	2	2	5	3	4	4	4	5	4	4	4	4	5	4	4	5	5	3	4	2	1	7	1	4	5	5	2	6	5	2	6	4
3	201	1	2	2	5	3	5	6	3	6	6	3	4	6	6	3	5	4	4	3	5	4	3	6	2	2	6	4	2	6	4	2	6	3
3	202	1	2	2	7	4	4	4	2	1	7	1	1	2	5	3	5	3	1	3	4	6	1	5	5	1	3	1	3	4	6	2	5	5
3	203	1	2	2	6	1	2	4	2	1	5	2	4	3	4	5	5	2	6	2	2	2	2	6	1	2	5	2	2	5	4	2	6	4
3	204	1	2	2	4	5	4	4	3	5	4	5	4	3	5	5	3	3	3	5	5	4	5	5	2	4	4	5	4	4	6	3	4	5
3	205	1	2	2	7	1	4	7	1	4	7	2	4	7	1	5	2	4	6	1	7	6	1	7	4	1	7	3	1	7	3	1	7	3
3	206	1	2	2	7	1	1	6	2	2	7	1	1	4	4	6	5	2	5	3	5	7	5	5	1	3	5	7	1	7	7	1	7	7
3	207	1	2	2	7	2	3	7	7	6	7	1	1	7	4	7	4	7	7	4	7	7	3	7	7	4	4	7	2	7	7	4	7	7
3	208	1	2	2	7	3	4	6	2	4	7	1	4	3	5	5	3	5	7	4	2	5	1	6	2	5	2	6	3	6	6	1	7	4
3	209	1	2	2	7	1	6	7	2	5	3	5	3	6	2	4	7	2	7	7	2	7	1	7	1	3	6	7	1	5	2	2	6	5
3	210	1	2	2	3	4	3	4	3	3	4	5	3	4	3	2	3	5	2	5	2	3	2	3	2	4	2	2	4	5	2	5	3	3
3	211	1	2	2	2	1	2	2	1	3	2	3	2	1	6	4	4	3	5	3	6	7	1	7	2	2	6	7	2	6	2	3	7	5
3	212	1	2	2	7	4	3	7	4	4	6	3	3	3	7	7	7	5	7	3	7	7	2	5	1	3	6	7	2	7	5	2	7	7
3	213	1	1	2	5	6	5	6	5	5	6	6	5	6	5	5	5	6	5	5	6	5	6	6	5	5	6	5	5	6	5	5	6	5
3	214	1	1	2	7	6	5	7	5	5	7	5	5	7	5	6	7	6	7	6	5	7	4	7	5	5	6	7	5	7	7	3	7	5
3	215	1	1	2	7	2	3	7	3	3	1	6	3	3	5	6	4	4	3	5	5	5	4	6	3	1	6	5	2	5	5	1	7	2
3	216	1	1	2	6	2	3	7	1	2	6	2	4	2	6	4	6	2	4	2	6	7	2	6	5	2	6	6	2	6	6	1	7	6
3	217	1	1	2	4	1	3	4	1	3	4	3	4	4	5	4	2	2	4	4	4	5	5	5	2	3	6	5	3	7	7	5	7	6
3	218	1	1	2	7	2	7	7	2	7	2	7	2	2	7	6	4	7	5	3	7	7	1	7	1	4	7	7	1	7	1	1	7	1
3	219	1	1	2	6	2	4	6	2	4	7	3	4	2	6	5	7	5	6	3	7	5	1	7	2	2	7	6	1	7	4	1	7	2
3	220	1	1	2	4	3	3	3	3	3	2	2	3	3	4	3	4	4	4	5	5	4	3	5	3	4	4	4	3	4	3	4	4	3
3	221	1	1	2	5	3	4	5	2	3	2	5	6	2	6	1	3	6	7	3	5	7	1	5	2	3	6	7	2	7	1	3	2	2
3	222	1	1	2	3	1	3	5	2	3	1	7	6	3	6	7	6	6	7	2	5	7	1	7	2	2	7	7	3	7	3	3	7	5
3	223	1	1	2	7	3	5	6	3	4	7	4	4	3	7	5	7	4	4	5	1	3	4	7	6	4	7	6	3	7	3	4	7	5
3	224	1	1	2	7	2	7	4	4	4	4	3	3	5	3	6	5	3	5	3	5	4	5	7	5	4	5	5	4	7	5	1	7	2
3	225	1	1	2	5	3	5	6	3	6	4	5	6	5	4	7	4	6	7	5	7	7	5	7	5	4	7	7	4	7	7	5	7	7
3	226	1	1	2	6	2	4	6	2	4	2	5	5	2	6	6	6	3	4	2	7	4	1	7	2	1	7	4	1	7	3	1	7	2
3	227	1	1	3	6	1	4	5	3	4	2	4	2	3	5	5	6	4	6	4	6	7	2	5	4	3	6	5	2	6	3	3	7	3
3	228	1	1	3	6	4	6	4	6	4	2	7	4	4	6	5	6	3	7	4	6	7	2	7	4	3	7	5	2	7	7	2	7	3
3	229	1	1	3	7	1	4	6	1	4	7	2	1	4	2	5	7	1	4	3	6	7	2	6	4	2	5	4	1	7	4	1	7	7
3	230	1	1	3	7	2	4	7	2	6	2	7	2	4	4	7	2	7	7	1	7	7	1	7	1	2	7	7	1	7	4	1	7	6
3	231	1	1	3	4	1	4	3	4	5	3	4	4	3	6	6	4	6	7	3	7	5	1	7	3	2	6	5	2	7	2	3	7	5
3	232	1	1	3	7	4	4	7	3	5	7	3	5	4	7	7	7	3	7	3	7	7	4	7	3	5	6	7	3	7	7	3	7	7
3	233	1	1	3	7	4	6	7	5	6	6	4	6	6	7	6	5	5	7	5	7	7	4	7	7	4	7	5	4	7	7	5	7	7
3	234	1	1	3	6	4	5	7	1	2	1	7	4	2	7	7	2	5	7	4	7	7	1	7	4	1	6	7	1	6	1	1	7	4
3	235	1	1	3	4	3	6	5	2	4	4	2	1	4	6	7	3	4	7	3	6	7	1	6	3	4	5	7	4	6	6	3	6	2
3	236	1	1	2	3	4	3	2	2	3	3	5	5	4	3	4	3	5	7	2	5	6	4	6	6	5	3	5	4	2	6	4	5	6
3	237	1	1	2	6	3	4	7	2	4	1	7	6	3	6	5	6	7	7	2	6	7	2	5	3	2	5	4	2	6	5	2	7	4
3	238	1	1	2	5	3	4	5	3	3	2	2	3	5	6	6	4	7	6	5	6	6	2	6	4	3	5	5	4	5	6	3	5	5
3	239	1	1	2	6	2	2	6	2	2	7	1	1	2	6	4	5	3	4	3	5	5	3	5	2	2	6	5	2	6	7	1	7	6
3	240	1	1	3	2	3	4	4	3	1	7	3	2	7	7	7	5	6	7	7	6	6	7	7	4	7	7	5	7	7	6	7	7	1
3	241	1	1	3	4	2	3	5	4	3	4	5	2	4	5	5	4	4	4	5	5	6	3	5	6	4	6	5	2	6	3	3	6	5
3	242	1	1	3	7	4	6	4	4	4	3	6	4	5	6	7	4	6	6	4	7	6	2	7	2	5	7	7	1	7	5	3	7	2
3	243	1	1	3	7	4	5	7	7	5	4	6	6	7	5	7	7	5	6	5	7	5	5	7	6	6	5	7	7	5	5	7	6	6
3	244	1	1	3	6	1	4	5	3	4	4	4	4	4	5	5	7	6	5	5	6	7	5	6	7	1	6	7	1	5	6	2	7	1
3	245	1	1	3	7	1	4	7	1	6	7	1	6	5	7	6	2	5	4	5	4	3	3	6	2	5	7	7	5	7	4	6	3	3
3	246	1	1	3	4	2	4	3	1	4	5	1	7	4	7	5	2	2	1	1	4	7	1	6	4	4	4	7	1	7	4	3	4	7
3	247	1	1	3	5	3	4	4	4	4	4	5	6	4	5	7	5	4	7	5	4	7	4	5	7	3	6	7	4	6	7	4	6	7
3	248	1	1	3	6	4	6	6	5	3	5	4	6	6	7	7	5	6	7	6	5	7	3	6	5	6	7	7	3	6	7	2	7	5
3	249	1	1	3	7	4	6	6	2	3	6	2	3	1	7	6	3	6	6	1	7	7	6	4	6	1	7	7	1	7	7	1	7	5
3	250	1	1	3	7	3	6	7	3	6	7	4	6	6	5	7	4	6	7	7	5	7	6	5	7	4	6	7	5	4	7	6	6	7
3	251	1	1	2	6	3	3	4	2	4	4	2	3	4	5	6	4	5	6	4	5	5	4	6	4	2	5	7	4	4	5	3	6	7
3	252	1	1	2	6	2	4	7	2	4	7	2	5	5	5	5	7	2	5	5	3	6	5	5	3	4	5	6	3	6	6	2	7	4
3	253	1	1	2	5	2	3	7	2	4	7	3	3	3	7	7	6	3	7	6	2	7	3	6	5	3	7	7	2	7	5	2	7	7
3	254	1	1	2	6	1	5	6	3	6	2	4	5	2	7	7	5	6	7	4	7	7	3	7	5	2	7	7	3	7	6	2	7	5
3	255	1	1	2	5	3	4	6	2	3	2	5	3	3	6	5	4	4	5	5	6	6	4	6	3	4	5	5	2	6	3	3	6	5
3	256	1	1	2	4	3	5	4	4	4	3	4	3	5	3	4	6	2	6	6	4	6	4	4	5	2	6	7	3	6	6	3	7	7
3	257	1	1	2	5	4	5	4	4	5	5	4	6	4	5	7	5	5	6	5	6	7	5	6	7	4	6	5	6	5	6	5	6	7
3	258	1	1	2	6	4	5	7	4	5	7	4	5	4	7	7	4	4	6	4	7	7	4	6	5	4	6	6	4	7	5	4	7	7
3	259	1	1	2	4	3	4	3	3	3	4	4	3	6	6	7	5	5	6	6	6	7	4	4	4	4	4	5	5	5	3	6	6	2
3	260	1	1	2	3	1	3	6	6	3	6	5	3	3	4	2	6	4	4	4	5	5	3	7	2	4	7	3	4	3	3	4	3	2
3	261	1	1	2	5	5	6	4	5	4	6	5	4	5	6	5	5	5	5	5	5	4	6	5	4	4	5	4	4	5	4	4	4	4
3	262	1	1	2	3	6	5	4	3	4	2	6	4	3	6	6	7	4	5	2	6	5	3	7	3	2	5	6	2	6	3	1	6	4
3	263	1	1	2	7	3	7	5	6	6	6	6	5	6	7	6	6	7	6	5	5	5	4	5	4	4	6	6	4	5	4	4	5	4
3	264	1	1	2	6	2	3	6	1	2	1	4	2	1	6	5	5	2	4	3	5	7	1	5	1	2	5	4	1	5	2	1	7	2
3	265	1	1	2	5	4	5	4	5	4	6	6	5	6	5	6	6	7	6	5	5	6	5	6	7	5	7	6	5	6	6	5	6	6
3	266	1	1	2	6	6	5	6	5	6	4	5	3	5	6	6	5	4	4	4	3	1	4	3	3	4	3	4	4	5	5	2	5	4
3	267	1	1	2	5	4	2	4	2	3	5	4	2	6	6	4	2	5	5	5	6	6	5	1	7	6	5	7	7	4	5	5	5	5
3	268	1	1	2	6	2	6	7	1	7	4	5	3	7	7	7	7	3	7	3	5	2	2	7	1	2	6	3	2	6	3	1	7	1
3	269	1	1	2	7	3	7	3	4	7	4	3	7	3	5	5	7	4	7	5	4	7	7	7	1	7	2	7	6	6	7	7	6	4
3	270	1	1	2	6	5	5	6	7	6	6	5	7	6	4	7	7	5	6	5	6	5	5	6	6	4	6	7	6	5	5	6	7	5
3	271	1	1	2	7	2	3	7	2	3	7	4	2	6	5	6	7	3	7	7	3	7	4	7	7	3	6	7	2	7	7	2	7	2
3	272	1	1	2	7	2	6	7	1	5	3	5	4	2	7	7	1	7	6	6	2	6	1	7	5	1	7	7	1	7	7	1	7	6
